# Supplementary material
Source: publisher site journal article supplement (https://www.dovepress.com/article/442382)
Supplement: Supplementary file 1 [file get_supplementary_file.php]

## Supplements

**Table S1. Grouping according to the Rome severity classification.**

| Severity              | Criteria for assessing AECOPD severity                                                                                                                                                                                                                                                                                                                                               |
|-----------------------|--------------------------------------------------------------------------------------------------------------------------------------------------------------------------------------------------------------------------------------------------------------------------------------------------------------------------------------------------------------------------------------|
| <b>Severe</b>         | ABG demonstrates hypercapnia and acidosis (PaCO <sub>2</sub> >45 mmHg and pH <7.35)                                                                                                                                                                                                                                                                                                  |
| <b>Moderate</b>       | a. ABG demonstrates hypoxemia (PaO <sub>2</sub> ≤60 mmHg), hypercapnia (PaCO <sub>2</sub> >45 mmHg) or both, but no acidosis (pH >7.35)<br>b. At least 3 of the 5 variables are eligible: <ul style="list-style-type: none"> <li>• Dyspnea VAS ≥5</li> <li>• RR ≥24 breaths/min</li> <li>• HR ≥95 bpm</li> <li>• Resting SaO<sub>2</sub> &lt;92%*</li> <li>• CRP ≥10 mg/L</li> </ul> |
| <b>Mild (default)</b> | <ul style="list-style-type: none"> <li>• Dyspnea VAS &lt;5</li> <li>• RR &lt;24 breaths/min</li> <li>• HR &lt;95 bpm</li> <li>• Resting SaO<sub>2</sub> ≥ 92%</li> <li>• CRP &lt;10 mg/L</li> </ul>                                                                                                                                                                                  |

**Notes:** Arterial blood gas analysis results are obtained from the stable stage of the patients who breathing ambient air or the usual oxygen prescription

**Abbreviations:** AECOPD, acute exacerbation of chronic obstructive pulmonary disease; ABG, arterial blood gases; PaCO<sub>2</sub>, arterial carbon dioxide tension; pH, hydrogen ion concentration; PO<sub>2</sub>, arterial oxygen tension; VAS, visual analog scale; RR, respiratory rate; HR, heart rate; CRP, C-reactive protein; SaO<sub>2</sub>, Arterial Oxygen Saturation.

**Table S2. Between-group differences of criteria for determining AECOPD severity according to the Rome classification.**

| multiple comparisons     | Mild-Moderate    | Mild-Severe      | Moderate-Severe  | P value*         |
|--------------------------|------------------|------------------|------------------|------------------|
| Dyspnea (VAS >5)         | <b>&lt;0.001</b> | <b>&lt;0.001</b> | <b>&lt;0.001</b> | <b>&lt;0.001</b> |
| RR (breath/min)          | <b>&lt;0.001</b> | <b>&lt;0.001</b> | 1.000            | <b>&lt;0.001</b> |
| HR (bpm)                 | <b>&lt;0.001</b> | <b>&lt;0.001</b> | 1.000            | <b>&lt;0.001</b> |
| SaO <sub>2</sub> (%)     | <b>&lt;0.001</b> | <b>&lt;0.001</b> | 1.000            | <b>&lt;0.001</b> |
| CRP (mg/L)               | <b>&lt;0.001</b> | <b>&lt;0.001</b> | <b>&lt;0.001</b> | <b>&lt;0.001</b> |
| PaO <sub>2</sub> (mmHg)  | <b>&lt;0.001</b> | 0.108            | <b>&lt;0.001</b> | <b>&lt;0.001</b> |
| PaCO <sub>2</sub> (mmHg) | <b>&lt;0.001</b> | <b>&lt;0.001</b> | <b>&lt;0.001</b> | <b>&lt;0.001</b> |

**Notes:** \*Those with P value < 0.05 were highlighted using the bold font. Dunn's test with a Bonferroni correction for multiple comparisons was applied.

**Abbreviations:** AECOPD, acute exacerbation of chronic obstructive pulmonary disease; RR, respiration rate; HR, heart rate; bpm, beats per minute; SaO<sub>2</sub>, Arterial Oxygen Saturation; CRP, C-reactive protein; PaO<sub>2</sub>, the partial pressure of oxygen; PaCO<sub>2</sub>: the partial pressure of carbon dioxide.
